# Supplementary material
Source: publisher figshare collection journal article supplement (https://tandf.figshare.com/ndownloader/files/22276911)
Supplement: Supplementary file 1 [file 22276911]

## Supplementary Materials

### Supplementary Figure and Figure Legend

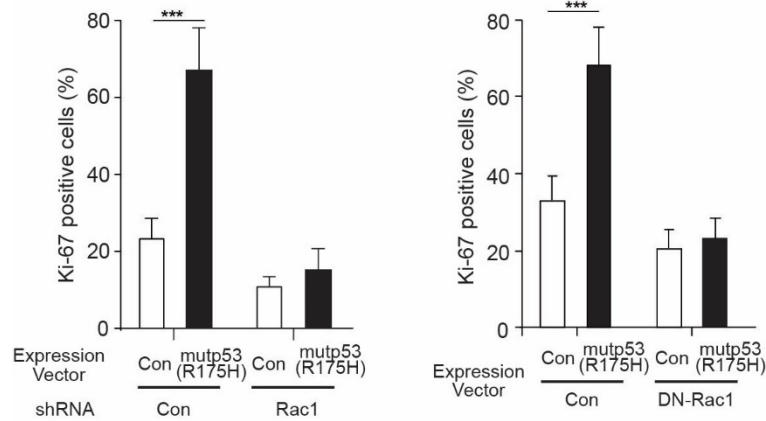

**Supplementary Figure 1.** The quantification of Ki-67 IHC staining in xenograft tumors formed by H1299-Con and H1299-R175H cells with or without knockdown of Rac1 by shRNA vectors (left panel), and with or without ectopic DN-Rac1 expression (right panel) . Data are presented as mean  $\pm$  SD. \*\*\*:  $p < 0.001$ ; Student's  $t$ -test.
